# Supplementary material for: Targeting SGK1 Mitigates Synovial Fibrosis via Suppressing M1 Polarization to Alleviate Osteoarthritis
Source: Research Square preprint supplement (doi:10.21203/rs.3.rs-6880630/v1), 2025-06-17
Supplement: Supplementary file 1 [file 8661806e4a1ae555947fe31b.docx]

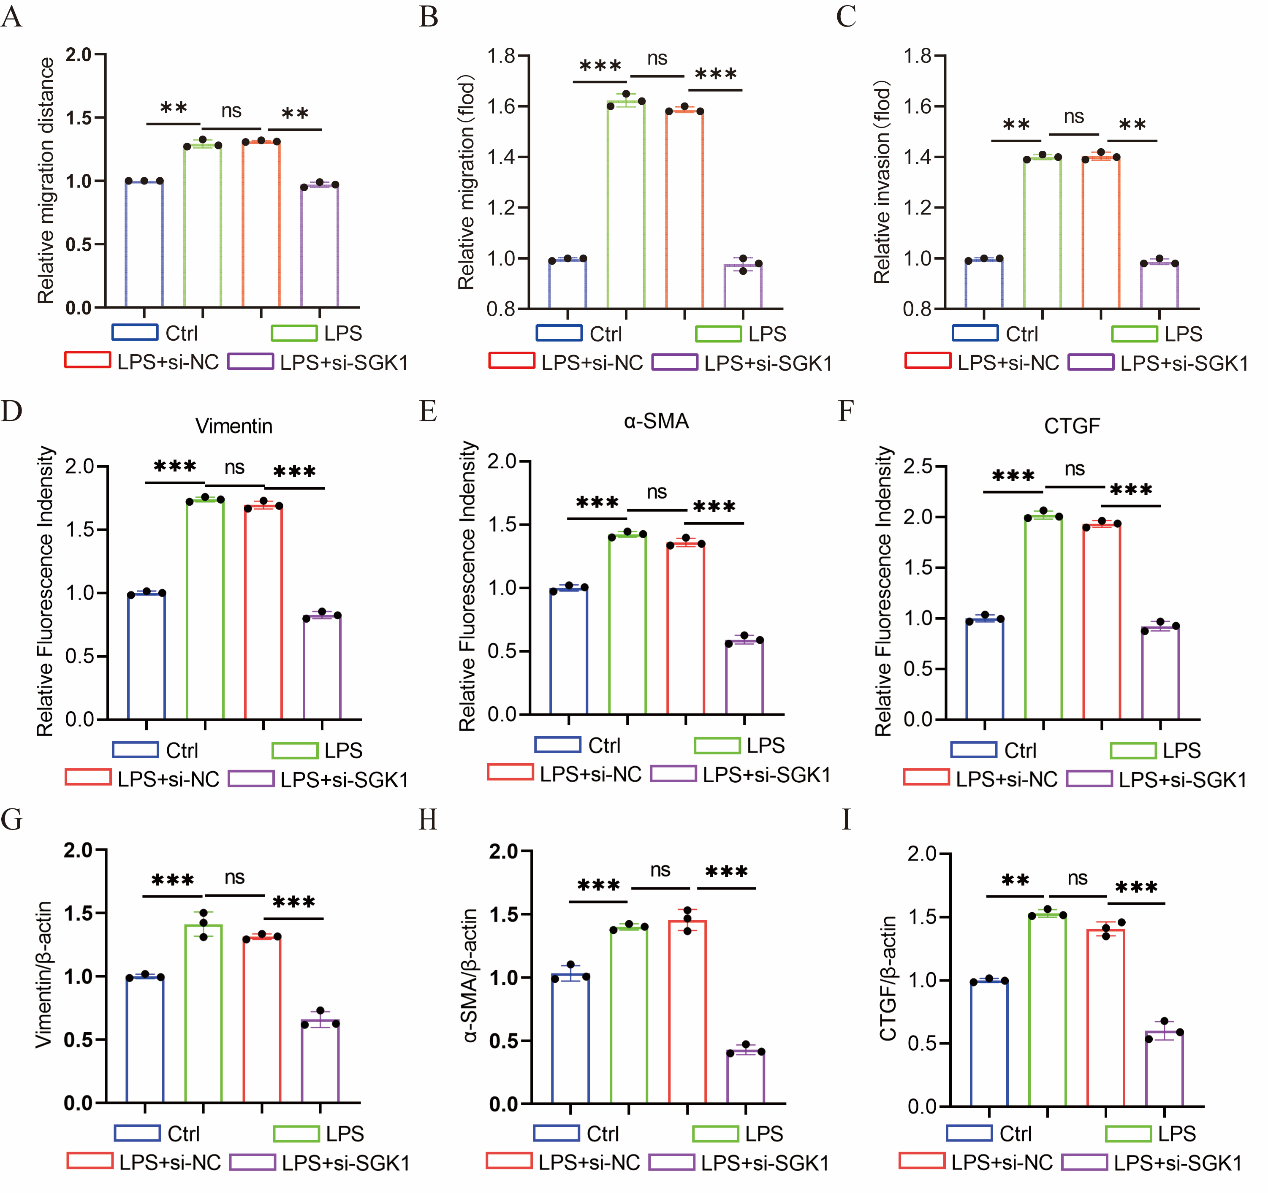


**Figure S1.** （A-C）Quantitative analysis of scratch, migration, and invasion（D-F）Relative fluorescence intensity of Vimentin, α-SMA, and CTGF.（G-I）Quantitative analysis of related proteins. n=3, * p < 0.05, ** p < 0.01, *** p < 0.001.


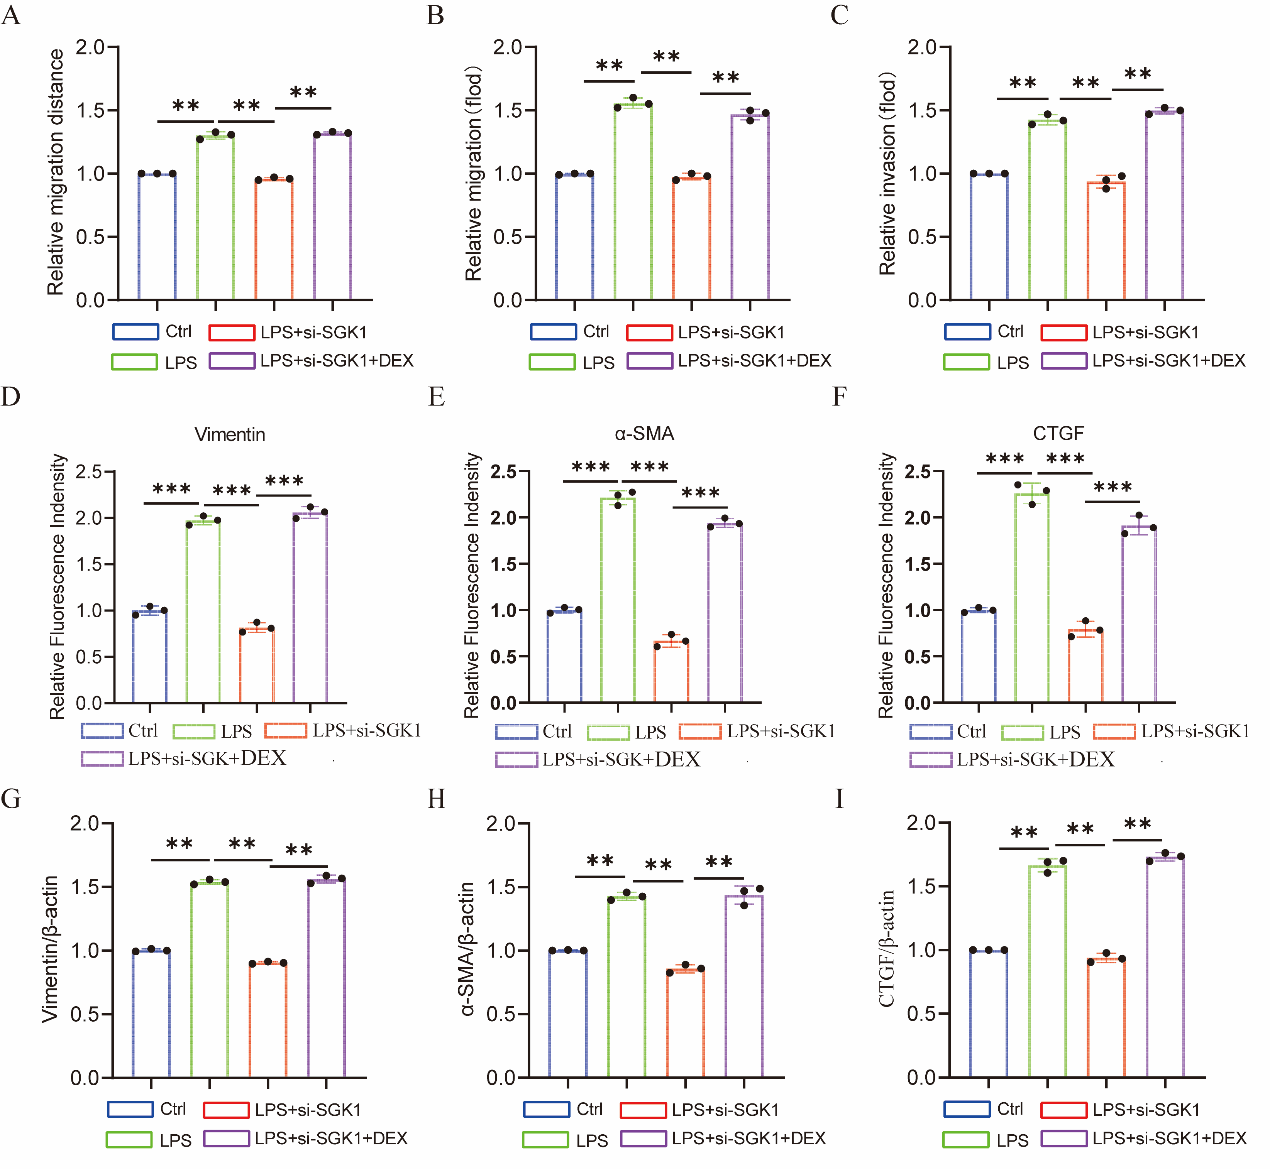


**Figure S2.** （A-C）Quantitative analysis of scratch, migration, and invasion（D-F）Relative fluorescence intensity of Vimentin, α-SMA, and CTGF.（G-I）Quantitative analysis of related proteins. n=3, * p < 0.05, ** p < 0.01, *** p < 0.001.


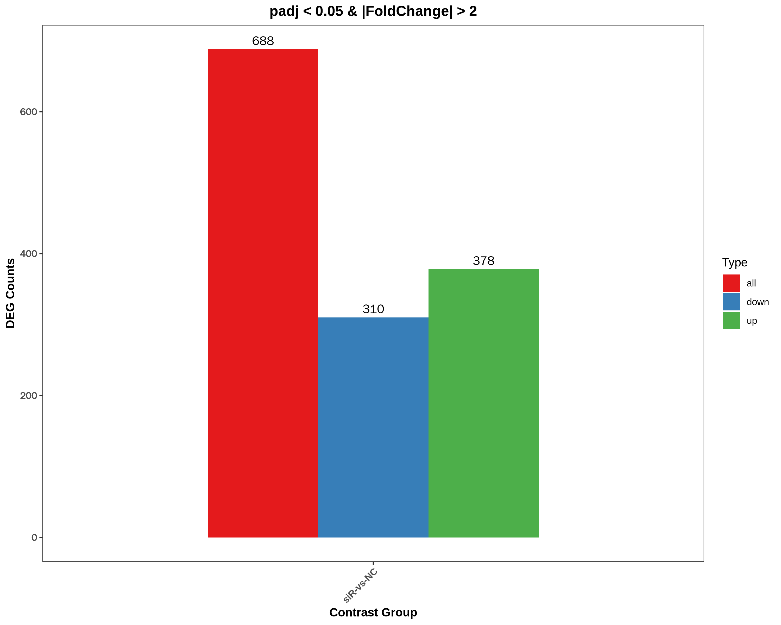


**Figure S3.** Identification and Analysis of Gene Variations through Transcriptome Sequencing
